# Supplementary material for: Mechanochromic luminogen with aggregation-induced emission: implications for ink-free rewritable paper with high fatigue resistance and low toxicity
Source: Royal Society of Chemistry journal article supplement (doi:10.1039/c6tc03428d), 2016-01-01
Supplement: c6tc03428d1.pdf [file c6tc03428d1.pdf]

***Electronic Supplementary Information (ESI)***

**Mechanochromic luminogen with aggregation-induced emission: implication for ink-free rewritable paper with high fatigue resistance and low toxicity**

Jingyan Sun,<sup>a</sup> Jingqi Han,<sup>a</sup> Yang Liu,<sup>b</sup> Yuai Duan,<sup>a</sup> Tianyu Han\*<sup>a</sup> and Jing Yuan\*<sup>a</sup>

<sup>a</sup>*Department of Chemistry, Capital Normal University, 100048, Beijing, P. R. China. E-mail: phanw@163.com.*

<sup>b</sup>*Beijing Key Laboratory of Radiation Advanced Materials, Beijing Research Center for Radiation Application, 100015, Beijing, P. R. China.*

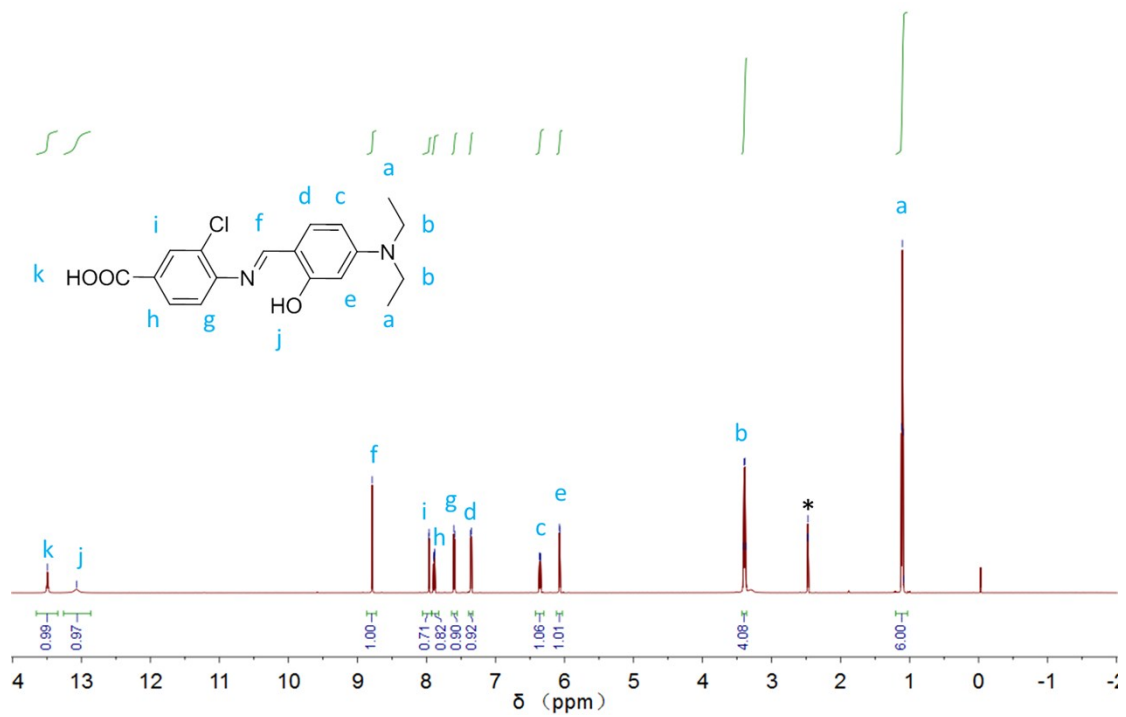

Fig. S1  $^1\text{H}$  NMR (600 MHz, 298 K) spectrum of DHBA in  $\text{DMSO-}d_6$ .

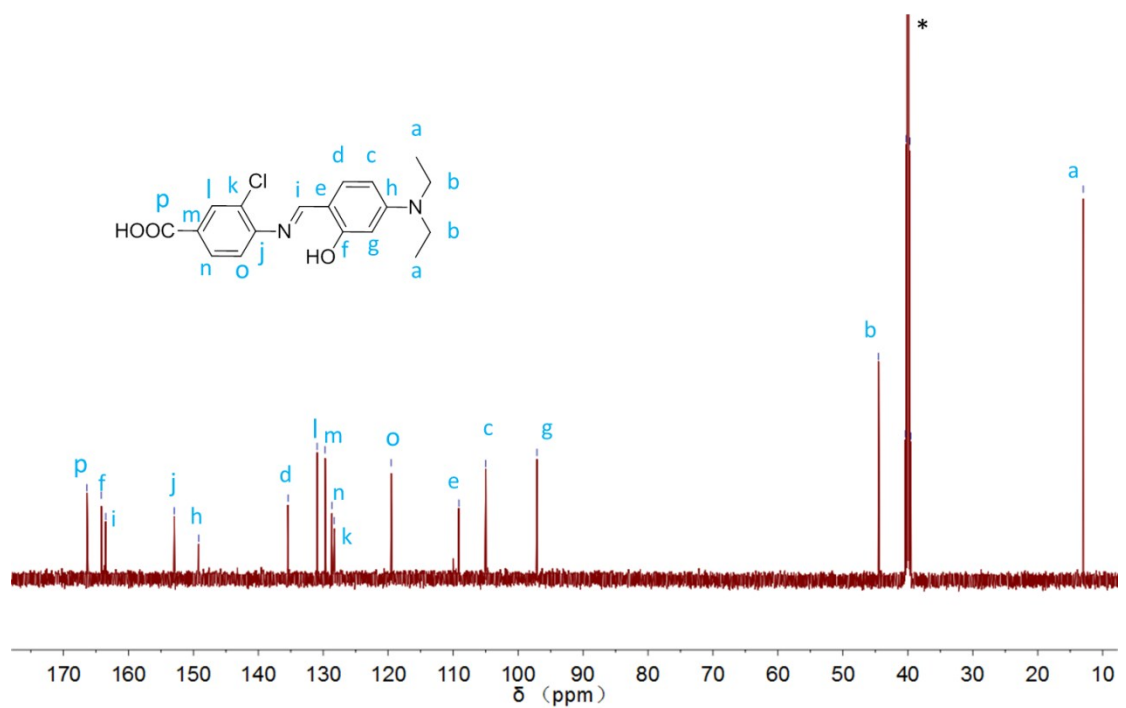

Fig. S2  $^{13}\text{C}$  NMR (600 MHz, 298 K) spectrum of DHBA in  $\text{DMSO-}d_6$ .

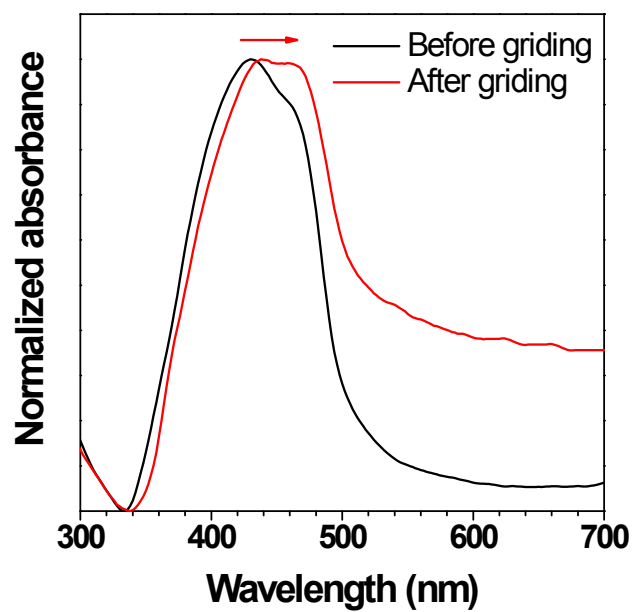

Fig. S3 UV-vis absorption spectra of unground and ground DHBA sample.

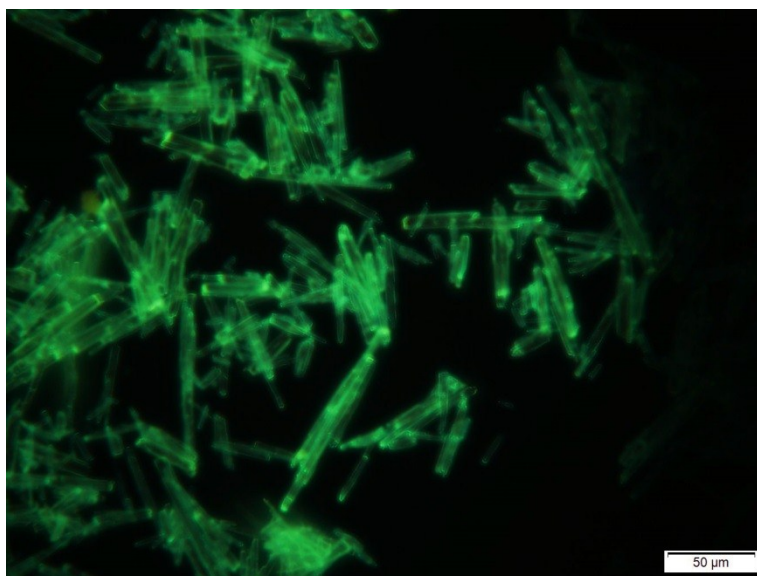

Fig. S4 fluorescence microscopy images of crystalline powder. Excitation wavelength: 405 nm.

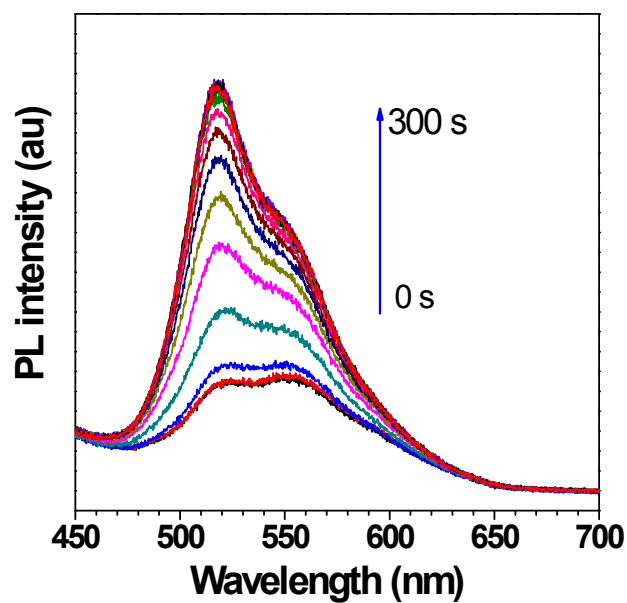

Fig. S5 Time-dependent emission spectra of the ground sample exposed to EA vapour.

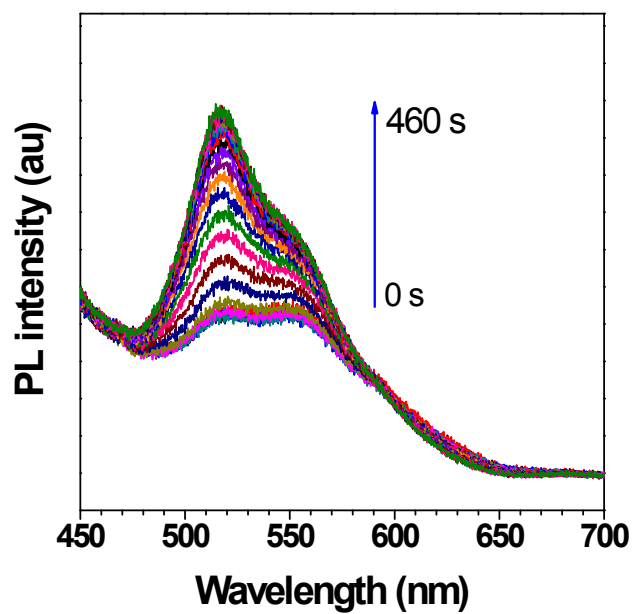

Fig. S6 Time-dependent emission spectra of the ground sample exposed to ethanol vapour.

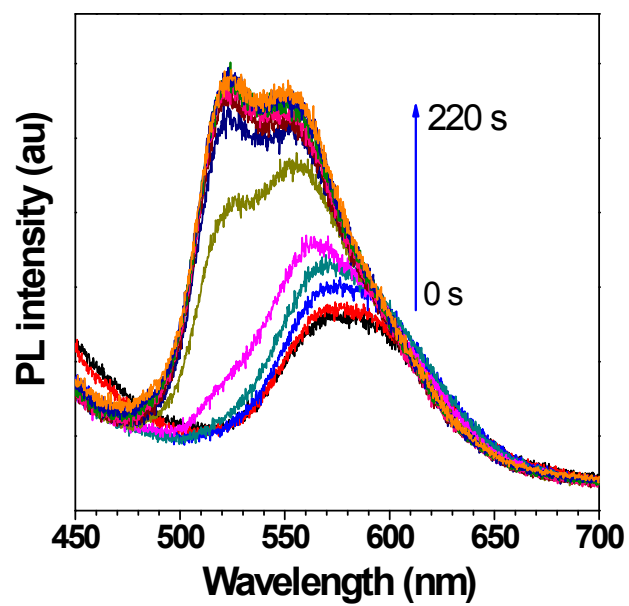

Fig. S7 Time-dependent emission spectra of the ground sample exposed to chloroform vapour.
